# Supplementary material for: Bee Pollen and Probiotics May Alter Brain Neuropeptide Levels in a Rodent Model of Autism Spectrum Disorders
Source: MDPI journal article supplement (doi:10.3390/metabo12060562), 2022-06-18
Supplement: s1 [file s1]

Supplementary figures

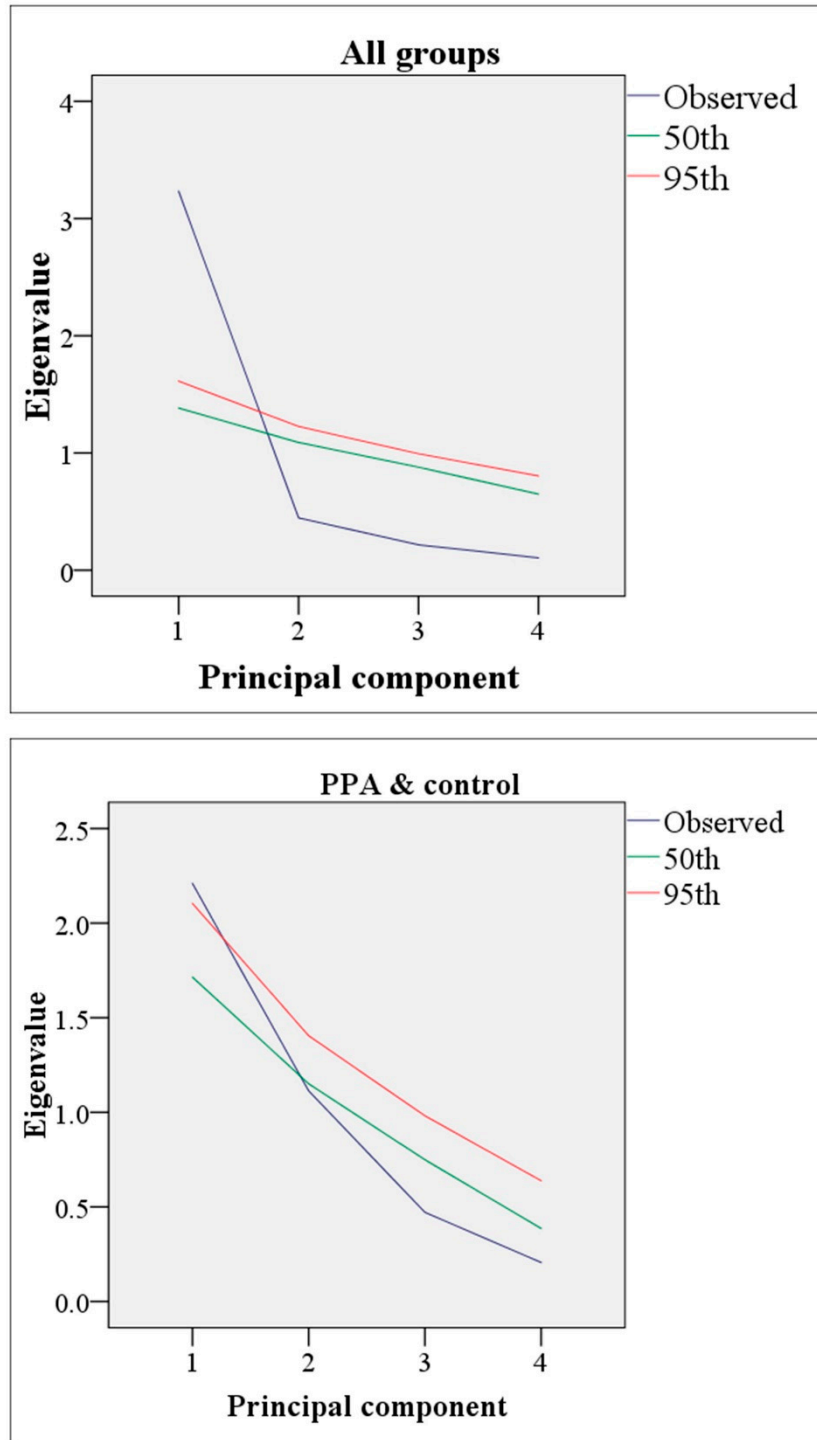

**Figure S1.** Evaluation of principal component significance using Monte Carlo simulation. Principal components and their corresponding eigenvalues are plotted for observed data (blue lines), 50<sup>th</sup> percentile (green lines), and 95<sup>th</sup> percentile (red lines) simulated data. Significant principal components in the observed data must have higher eigenvalues than the corresponding simulated principal components.

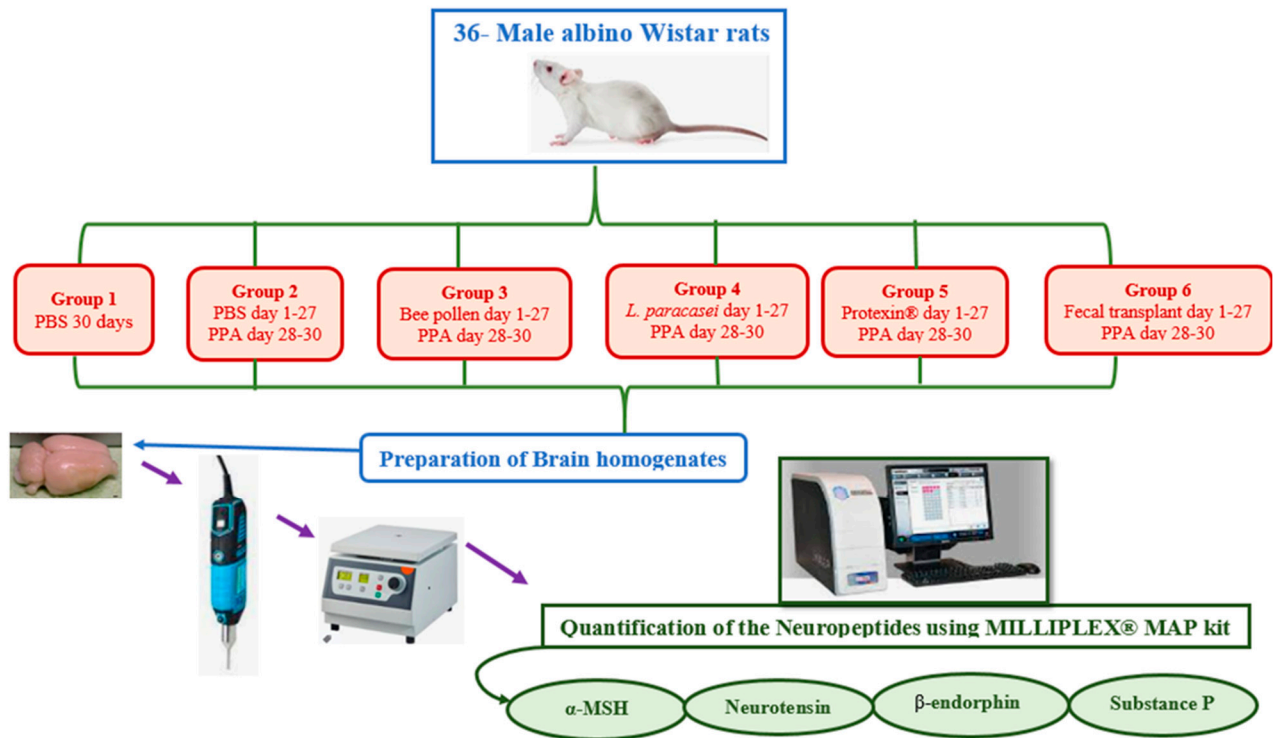

**Figure S2.** Graphical scheme illustrating the animal groups as control (G1), PPA-rodent model (G2), BP, LP, MPB, and FT pre-protected PPA-rodent model (Gs 3-6).
